# Supplementary material for: A new synthesis scheme of pyrite and chalcopyrite reference materials for in situ iron and sulfur isotope analysis using LA-MC-ICP-MS
Source: Royal Society of Chemistry journal article supplement (doi:10.1039/d1ja00392e), 2022-01-01
Supplement: d1ja00392e1.pdf [file d1ja00392e1.pdf]

## Electronic Supplementary Information (ESI)

### **A new synthesis scheme of pyrite and chalcopyrite reference materials for *in situ* iron and sulfur isotope analysis using LA-MC- ICP-MS**

*Yantong Feng,<sup>a</sup> Wen Zhang, <sup>\*a</sup> Zhaochu Hu,<sup>a</sup> Tao Luo,<sup>a</sup> Ming Li,<sup>a</sup> Yongsheng Liu,<sup>a</sup>*

*Hong Liu,<sup>a</sup> Qinglin Li<sup>a</sup>*

<sup>a</sup>State Key Laboratory of Geological Processes and Mineral Resources, China

University of Geosciences, Wuhan, 430074, PR China

\*Corresponding author

E-mail: tuyaken@hotmail.com

Tel: 86-27-67885096

Fax: 86-27-67885096

***Submitted to Journal of Analytical Atomic Spectrometry***

## Supplementary information A

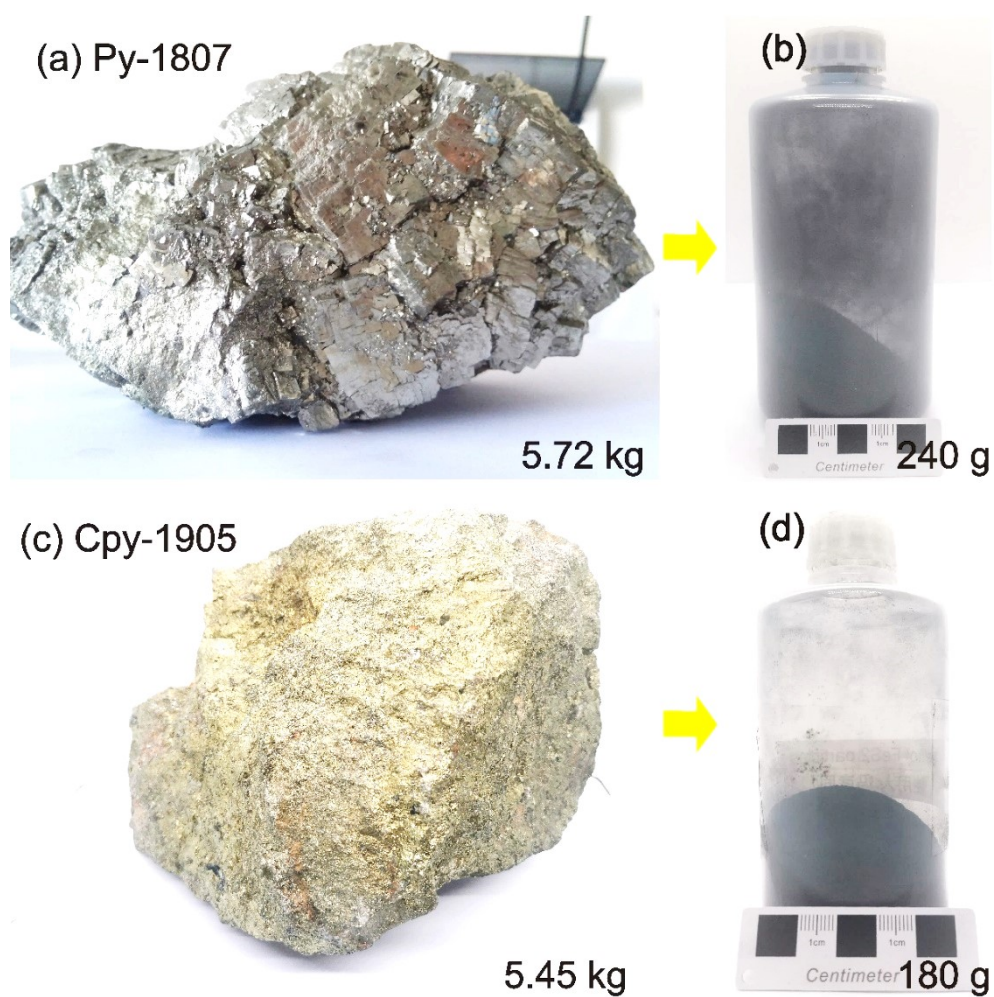

**Figure S1.** The photographs of the natural pyrite Py-1807 (a) and chalcopyrite Cpy-1905 (c), and the ultra-fine powders (b and d).
