# Supplementary material for: A new synthesis scheme of pyrite and chalcopyrite reference materials for in situ iron and sulfur isotope analysis using LA-MC-ICP-MS
Source: Royal Society of Chemistry journal article supplement (doi:10.1039/d1ja00392e), 2022-01-01
Supplement: d1ja00392e2.xlsx [file d1ja00392e2.xlsx]

## Sheet: Table S1
Table S1. The LA-MC-ICP-MS measurement value and reference value of Fe isotope in Aa018, JC-Po and JC-Pn.
	Reference materials	Reference value				Measurement value
		δ56Fe (‰)	2SD	δ57Fe (‰)	2SD	δ56Fe (‰)	2SD	δ57Fe (‰)	2SD	Measurement number
	Aa018	0.52	0.04	0.73	0.05	0.591192	0.15	0.912862	0.35	71
	JC-Po	-0.34	0.07	-0.5	0.11	-0.46197	0.12	-0.666012	0.22	31
	JC-Pn	1.47	0.04	2.18	0.05	1.37282	0.27	2.07083	0.51	26
	References: K. Y. Chen, H. L. Yuan, Z. A. Bao and N. Lv, Atom. Spectrosc., 2021, 42, 282–293. L. Chen, Y. Liu, Y. Li, Q. L. Li and X. H. Li, J. Anal. At. Spectrom., 2021, 36, 1431–1440.

## Sheet: Table S2
Table S2. The LA-MC-ICP-MS measurement value and reference value of S isotope in PPP-1.
	Reference material	Reference value		Measurement value
		δ34S (‰)	2SD	δ34S (‰)	2SD	Measurementl number
	PPP-1	5.3	0.2	5.36	0.31	30
	References: S. E. Gilbert, L. V. Danyushevsky, T. Rodemann, N. Shimizu, A. Gurenko, S. Meffre, H. Thomas, R. R. Large and D. Death, J. Anal. At. Spectrom., 2014, 29, 1042–1051.

## Sheet: Table S3
Table S3. The SN-MC-ICP-MS measurement results and reference values for BCR-2, BHVO-2, AGV-2 and BIR-1a.
	Name	δ56Fe (‰)	2SD	δ57Fe (‰)	2SD	Reference
	BCR-2	0.0761359	0.046	0.118699	0.075	This study
		0.09	0.021	0.133	0.04	Chen et al.1
		0.091	0.025	0.133	0.031	Dauphas et al.2
		0.091	0.011	0.126	0.017	Craddock et al.3
		0.084	0.029	0.13	0.048	He et al.4
	BHVO-2	0.114964	0.067	0.156381	0.069	This study
		0.102	0.026	0.149	0.056	Chen et al.1
		0.114	0.011	0.174	0.016	Craddock et al.3
		0.109	0.028	0.16	0.058	He et al.4
	AGV-2	0.0957384	0.06	0.132634	0.138	This study
		0.102	0.024	0.154	0.049	Chen et al.1
		0.105	0.011	0.146	0.016	Craddock et al.3
		0.096	0.027	0.148	0.039	He et al.4
		0.112	0.081	0.165	0.275	Dauphas et al.5
		0.106	0.036	0.179	0.025	Liu et al.6
	BIR-1a	0.0432437	0.036	0.0601452	0.052	This study
		0.06	0.042	0.085	0.072	Liu et al.6
	References: 1. K. Y. Chen, H. L. Yuan, P. Liang, Z. A. Bao, L. Chen. Improved Nickel-corrected isotopic analysis of Iron using high-resolution multi-collector inductively coupled plasma mass spectrometry, J. Mass. Spectrom., 2017, 421, 196–203. 2. N. Dauphas, P.R. Craddock, P.D. Asimow, V.C. Bennett, A.P. Nutman, D.Ohnenstetter, Iron isotopes may reveal the redox conditions of mantlemelting from …

## Sheet: Table S4
Table S4. The EA-IR-MS measurement values and reference values of S isotope in IAEA-S-1, IAEA-S-2 and IAEA-S-3.
	Reference materials	Reference value		Measurement value
		δ34S (‰)	2SD	δ34S (‰)	2SD	Measurementl number
	IAEA-S-1	-0.3	0.32	-0.240203	0.125965	14
	IAEA-S-2	22.67	0.3	22.6823	0.20615	14
	IAEA-S-3	-32.55	0.24	-32.3132	0.172755	14
	References: T. P. Ding, S. Valkiers, D. F. Wan, R. M. Bai, X. Q. Zou, Y. H. Li, Q. L. Zhang, P. De Bi evre, The δ33S and δ34S values and absolute 32S/33S and 32S/34S ratios of IAEA and Chinese sulfur isotope reference materials, Bull. China Soc. Mineral. Petrol. Geochem. 2001, 20, 425–427.

## Sheet: Table S5
	Table S5. The EPMA results of major elements in different PAS samples.
	Sample	Position	S (wt%)	Fe (wt%)	Cu (wt%)	Total (wt%)
	PAS-Py1070	1	42.006	57.116	/	99.122
		2	43.05	55.38	/	98.43
	PAS-Py1120	1	38.46	61.02	/	99.48
		2	39.755	58.168	/	97.923
	PAS-Cpy200	1	33.43	28.98	30.7	93.11
		2	32.69	32.38	33.23	98.3
		3	35.23	29.95	31.64	96.82
	PAS-Cpy400	1	33.27	28.08	32.94	94.29
		2	35.89	29.7	33.97	99.56
		3	37.01	28.83	32.07	97.91
	PAS-Cpy600	1	34.094	31.033	32.975	98.1
		2	34.758	31.703	32.746	99.21
		3	34.251	31.437	33.103	98.791
	PAS-Cpy800	1	34.126	31.388	33.038	98.552
		2	33.774	31.11	33.419	98.303
		3	34.03	31.38	33.002	98.412
		4	33.695	31.694	32.579	97.968
		5	33.052	32.071	32.363	97.486
		6	33.923	32.207	31.998	98.128
		7	33.392	30.833	33.562	97.787
	The theoretical composition (wB%) of pyrite are S: 53.3% and Fe: 46.7%, chalcopyrite are S: 34.8%, Fe: 30.4% and Cu: 34.8%, and pyrrhotite are S: 36.47% and Fe: 63.53%.

## Sheet: Table S6
Table S6. The Fe isotope composition in PAS-Py600, PAS-Cpy400 and PAS-Cpy600.
	Sample	LA Value
		No.	δ56Fe (‰)	2SE	δ57Fe (‰)	2SE
	PAS-Py600	1	0.255799	0.0546408	0.346443	0.0806143
		2	0.225789	0.0454811	0.404723	0.0792715
		3	0.275066	0.0343841	0.47333	0.0751026
		4	0.307283	0.0464088	0.443513	0.0664671
		5	0.313751	0.034625	0.409099	0.0730211
		6	0.249058	0.0415909	0.299606	0.0771642
		7	0.267296	0.0507599	0.446219	0.0834381
		8	0.223431	0.04594	0.330137	0.076566
		9	0.282383	0.0449553	0.366394	0.0892689
		10	0.229733	0.0423234	0.318567	0.0768855
		11	0.352457	0.0429332	0.515295	0.0670561
		12	0.283213	0.0489012	0.467292	0.0736848
		13	0.333835	0.0472363	0.435757	0.0787168
		14	0.321164	0.0359431	0.476677	0.0625395
		15	0.304399	0.0390878	0.431322	0.0818859
		16	0.336736	0.0326489	0.441583	0.0767264
		17	0.211106	0.0442698	0.315814	0.0620694
		18	0.309655	0.0448453	0.491301	0.0903682
		19	0.271189	0.0427619	0.317636	0.0630547
		20	0.21957	0.0372847	0.332088	0.0938262
		21	0.254144	0.0409025	0.306664	0.0508836
		22	0.285585	0.0540041	0.364068	0.0786635
		23	0.314204	0.0399456	0.442106	0.072757
		24	0.287686	0.0423209	0.464265	0.0635789
		25	0.299195	0.0428557	0.442122	0.0670521
		26	0.294942	0.0348268	0.380533	0.0751506
		27	0.26514	0.0327133	0.300154	0.0512386
		28	0.243252	0.032345	0.370439	0.0723513
		29	0.138438	0.0703492	0.102508	0.0905014
		30	0.252795	0.0646209	0.3468	0.0772345
		31	0.300377	0.0588519	0.326157	0.0891409
		32	0.218813	0.0569247	0.276489	0.0828004
		33	0.263096	0.0354453	0.285227	0.0687114
		34	0.315193	0.0406006	0.468728	0.0710169
		35	0.275863	0.0383559	0.417228	0.0655076
		36	0.329601	0.0398279	0.388992	0.0711431
		37	0.280808	0.0550274	0.42355	0.0787137
		38	0.284829	0.0419254	0.323707	0.0744963
		39	0.210195	0.0395306	0.258127	0.077986
		40	0.288634	0.0505093	0.334349	0.0651765
		41	0.245764	0.0423275	0.347098	0.0773115
		42	0.310471	0.0540173	0.387547	0.092587
		43	0.288634	0.0505093	0.334349	0.0651765
		44	0.245764	0.0423275	0.347098	0.0773115
		45	0.288634	0.0505093	0.334349	0.0651765
		46	0.245764	0.0423275	0.347098	0.0773115
		47	0.190087	0.0421011	0.251562	0.0759938
		48	0.229909	0.0397696	0.365238	0.0639061
		49	0.245513	0.0408891	0.415469	0.0666057
		50	0.250362	0.0413337	0.416792	0.0714204
		51	0.250508	0.0385295	0.427672	0.0713925
		52	0.295015	0.0451805	0.499446	0.0674178
		53	0.290916	0.0405805	0.43849	0.0783399
		54	0.20521	0.0472558	0.374244	0.0625223
		55	0.242302	0.0467498	0.402011	0.0772466
		56	0.24513	0.0334411	0.451614	0.0626401
		57	0.143302	0.0393802	0.306585	0.0557245
		58	0.178854	0.0435311	0.175973	0.068094
		59	0.241622	0.0372851	0.286372	0.0724749
		60	0.27972	0.041023	0.38942	0.070825
		61	0.287382	0.0407063	0.335587	0.065431
		62	0.298805	0.0398465	0.402598	0.0621514
		63	0.344707	0.0423138	0.508422	0.074861
		64	0.300475	0.0418084	0.412671	0.0854647
		65	0.274218	0.0443036	0.356799	0.0694268
		66	0.264084	0.0344214	0.319621	0.0590309
		67	0.27398	0.0323537	0.400407	0.0691889
		68	0.307332	0.0368814	0.396162	0.0693575
		69	0.226133	0.0461231	0.334627	0.0886857
		70	0.228626	0.049293	0.416518	0.0857585
		71	0.281051	0.0340365	0.399522	0.0664658
		72	0.23679	0.0456121	0.284792	0.0793171
		73	0.263926	0.0389871	0.310389	0.0714944
		74	0.278196	0.0330734	0.317	0.0779242
		75	0.294306	0.0377354	0.360963	0.0709626
		76	0.293069	0.0383812	0.3711	0.0724979
		77	0.289298	0.055556	0.397419	0.0754555
		78	0.28389	0.0417521	0.433043	0.0802444
		79	0.283511	0.0425393	0.338336	0.0717652
		80	0.246859	0.0318611	0.327077	0.0639257
		81	0.256605	0.0367289	0.233935	0.0748867
		82	0.279186	0.047819	0.35855	0.0764958
		83	0.285108	0.0523315	0.406119	0.083085
		84	0.18306	0.0311329	0.285455	0.0636075
		85	0.217777	0.0359453	0.208315	0.0699191
		86	0.212332	0.0466307	0.280095	0.070848
		Ave. Val.	0.266045	0.08 (2SD)	0.367197	0.15 (2SD)
		Sol. Val.
		No.	δ56Fe (‰)	2SE	δ57Fe (‰)	2SE
		1	0.185672	0.0282728	0.233449	0.0399706
		2	0.186268	0.0262589	0.319982	0.0491577
		3	0.214533	0.029632	0.30213	0.0501837
		4	0.184433	0.0315495	0.290122	0.0572259
		Ave. Val.	0.192726	0.03 (2SD)	0.286421	0.06 (2SD)
	PAS-Cpy400	1	-0.04	0.07	-0.04375	0.12
		2	-0.11	0.06	-0.15375	0.13
		3	-0.08	0.08	-0.11375	0.11
		4	-0.06	0.06	-0.08375	0.14
		5	-0.02	0.06	-0.03375	0.12
		6	-0.08	0.06	-0.11375	0.12
		7	-0.04	0.07	-0.12375	0.15
		8	-0.08	0.08	-0.19375	0.13
		9	-0.02	0.07	0.09625	0.14
		10	-0.08	0.06	-0.24375	0.14
		11	-0.08	0.08	-0.18725	0.12
		12	-0.1	0.07	-0.16725	0.12
		13	-0.01	0.09	-0.17725	0.14
		14	-0.1	0.07	-0.44725	0.11
		15	-0.03	0.08	-0.23725	0.14
		16	-0.17	0.05	-0.33725	0.11
		17	-0.13	0.06	-0.28725	0.15
		18	-0.05	0.06	-0.21725	0.11
		19	0.01	0.07	-0.01725	0.12
		20	-0.14	0.09	-0.29725	0.12
		21	-0.01	0.08	-0.21725	0.16
		22	-0.05	0.07	-0.19725	0.12
		23	-0.12	0.06	-0.18725	0.13
		24	-0.13	0.06	-0.19725	0.16
		25	-0.06	0.06	-0.17725	0.12
		26	-0.07	0.07	-0.12725	0.14
		27	0.04	0.06	-0.04725	0.1
		28	-0.03	0.07	-0.12725	0.12
		29	-0.07	0.06	-0.17725	0.12
		30	-0.05	0.08	0.04275	0.13
		31	-0.05	0.07	-0.04725	0.11
		32	-0.04	0.07	-0.10725	0.12
		33	-0.05	0.07	-0.07725	0.13
		34	-0.13	0.09	-0.11725	0.14
		35	0.03	0.08	-0.07725	0.09
		36	0.01	0.08	-0.00725	0.15
		37	0	0.08	0.06275	0.17
		38	0	0.08	-0.09725	0.15
		39	-0.150202	0.0666292	-0.313758	0.107664
		40	-0.05	0.08	-0.14725	0.12
		41	-0.123953	0.0783382	-0.406249	0.121732
		42	-0.08	0.07	-0.11725	0.15
		43	-0.196572	0.0631174	-0.382611	0.144809
		44	-0.03	0.07	-0.09725	0.14
		45	-0.0760337	0.0602239	-0.222047	0.112477
		46	-0.03	0.08	-0.12725	0.14
		47	-0.11	0.07	-0.33725	0.13
		48	-0.14	0.07	-0.32725	0.15
		49	-0.17	0.09	-0.50725	0.16
		50	-0.1	0.1	-0.23725	0.15
		51	-0.12	0.08	-0.24725	0.14
		52	0.04	0.08	-0.12725	0.17
		53	-0.02	0.09	-0.22725	0.17
		54	0	0.08	0.02275	0.15
		55	-0.09	0.08	-0.28725	0.14
		56	-0.19	0.08	-0.26725	0.12
		57	-0.04	0.07	-0.11725	0.14
		58	-0.12	0.08	-0.19725	0.16
		59	-0.14	0.07	-0.13725	0.11
		60	-0.17	0.07	-0.31725	0.12
		61	-0.0127595	0.0769453	-0.174022	0.141282
		62	-0.0164612	0.0702092	0.0366872	0.122544
		63	-0.0616658	0.0649067	-0.151704	0.10935
		64	-0.00244758	0.0629409	0.00426533	0.127296
		65	-0.062535	0.0748133	-0.12555	0.145628
		66	0.0102372	0.0679423	-0.171056	0.131088
		67	-0.0492602	0.077212	-0.168901	0.151729
		68	-0.0580352	0.0786636	-0.427544	0.121832
		69	-0.0599058	0.0579311	-0.257145	0.0902939
		70	-0.0799633	0.0577462	-0.223358	0.098691
		71	-0.0491413	0.0646527	-0.33167	0.121463
		72	-0.107948	0.06028	-0.332057	0.0918072
		73	-0.119206	0.0800652	-0.267346	0.141037
		74	-0.0564283	0.0571803	-0.168452	0.126455
		75	-0.0482606	0.0613148	-0.149527	0.115167
		76	-0.0938799	0.0558623	-0.239112	0.0970527
		77	-0.179373	0.0875548	-0.336153	0.119667
		78	-0.100214	0.0601344	-0.247708	0.146317
		79	-0.128935	0.0689271	-0.304916	0.132332
		80	-0.174439	0.0834297	-0.404035	0.145891
		81	-0.117164	0.0825804	-0.307012	0.116965
		82	-0.0985771	0.0531781	-0.241124	0.125781
		83	-0.055513	0.0659231	-0.237536	0.103921
		84	-0.073297	0.0509535	-0.0974554	0.104533
		85	-0.12651	0.0754112	-0.360633	0.173223
		86	-0.180882	0.0733669	-0.427895	0.123425
		87	-0.0810586	0.0674147	-0.134579	0.158067
		88	0.0399144	0.0776893	-0.15613	0.121104
		89	-0.0445869	0.0618972	-0.218866	0.11173
		90	-0.0991613	0.0725459	-0.271148	0.120783
		91	-0.06943	0.0859536	-0.147828	0.189135
		92	-0.0215867	0.0601805	-0.105325	0.160458
		93	-0.0920508	0.069345	0.0558742	0.133946
		Ave. Val.	-0.0727665	0.11 (2SD)	-0.187899	0.24 (2SD)
	PAS-Cpy600	1	-0.114485	0.0753817	-0.0895689	0.124021
		2	-0.0876722	0.0728336	-0.343815	0.164869
		3	0.0358927	0.0812018	-0.150791	0.146729
		4	0.0139212	0.0724885	-0.106924	0.146644
		5	-0.0124361	0.0663827	-0.0919078	0.157171
		6	-0.0902153	0.0873232	-0.389732	0.130362
		7	0.0232197	0.0704569	-0.0843591	0.134309
		8	-0.0620694	0.069939	-0.451479	0.165438
		9	-0.0920728	0.0794215	-0.345251	0.171182
		10	-0.140924	0.0844824	-0.182159	0.113668
		11	-0.0728532	0.0899619	-0.152731	0.151254
		12	0.0340685	0.0831241	-0.190881	0.175757
		13	-0.0304409	0.0814677	0.111691	0.138984
		14	0.0139197	0.0800672	-0.0658513	0.135917
		15	-0.03464	0.0981478	-0.237243	0.157096
		16	0.0212264	0.080793	-0.0417988	0.188714
		17	-0.0322393	0.110258	-0.175044	0.184024
		18	0.0201547	0.0740778	-0.0239533	0.162688
		19	-0.0876845	0.0777734	-0.129827	0.164251
		20	-0.039982	0.083433	-0.234271	0.168091
		21	-0.0484883	0.0698571	-0.246216	0.121212
		22	-0.0819258	0.0633901	-0.0844702	0.103594
		23	-0.12	0.06	-0.21375	0.14
		24	-0.19	0.07	-0.39725	0.15
		25	-0.0143108	0.0768519	-0.010899	0.133956
		26	-0.11	0.08	-0.14375	0.14
		27	-0.17	0.08	-0.26725	0.14
		28	-0.0288227	0.0713348	-0.0750057	0.116252
		29	-0.03	0.07	-0.05375	0.12
		30	-0.15	0.08	-0.29725	0.16
		31	0.00637057	0.082399	-0.123873	0.130819
		32	-0.04	0.08	0.01625	0.12
		33	-0.03	0.06	-0.09725	0.13
		34	-0.0535531	0.0621082	-0.242458	0.129649
		35	-0.02	0.07	-0.05375	0.12
		36	-0.13	0.06	-0.20725	0.13
		37	-0.0313697	0.074237	-0.241895	0.12376
		38	-0.05	0.08	-0.03375	0.12
		39	0.06	0.06	0.05275	0.13
		40	-0.137152	0.0815628	-0.342379	0.136381
		41	-0.05	0.06	-0.19375	0.11
		42	-0.186107	0.068012	-0.323219	0.108458
		43	-0.01	0.06	-0.23375	0.16
		44	0	0.08	-0.05725	0.14
		45	-0.123243	0.0741161	-0.302044	0.110606
		46	-0.09	0.07	-0.21375	0.12
		47	-0.13	0.08	-0.43725	0.16
		48	-0.149086	0.075476	-0.191877	0.134081
		49	-0.12	0.06	-0.11375	0.1
		50	-0.13	0.07	-0.16725	0.12
		51	-0.124581	0.0777884	-0.252674	0.1255
		52	-0.1	0.06	0.00625	0.12
		53	-0.11	0.06	-0.24725	0.1
		54	-0.123801	0.0860429	-0.153092	0.122695
		55	-0.04	0.07	-0.15375	0.11
		56	-0.05	0.07	-0.28725	0.16
		57	-0.0284189	0.0625284	-0.216877	0.116477
		58	0.01	0.07	-0.12375	0.15
		59	-0.12	0.07	-0.28725	0.13
		60	-0.102238	0.0890967	-0.188719	0.10263
		61	-0.0397961	0.0824879	-0.0702314	0.141532
		62	-0.11	0.06	-0.15375	0.11
		63	-0.09	0.08	-0.10725	0.11
		64	0.029241	0.0596827	-0.125239	0.119552
		65	-0.12	0.08	-0.13375	0.14
		66	-0.12	0.07	-0.05725	0.14
		67	-0.0689997	0.0915245	-0.245825	0.149812
		68	-0.2	0.06	-0.13375	0.12
		69	-0.0565357	0.0700035	-0.128419	0.128309
		70	0	0.11	-0.03375	0.13
		71	-0.079569	0.0678022	-0.270076	0.105734
		72	-0.13	0.07	-0.12375	0.13
		73	-0.0942034	0.0686622	-0.110732	0.141953
		74	-0.05	0.07	0.11625	0.11
		75	-0.137572	0.0836265	-0.254759	0.148586
		76	-0.03	0.08	-0.15375	0.13
		77	-0.131819	0.0755124	-0.192845	0.158534
		78	0	0.07	0.16625	0.13
		79	0.01	0.08	0.14625	0.14
		80	-0.0947263	0.0583961	-0.17107	0.123079
		81	0	0.08	-0.03375	0.12
		82	-0.0744423	0.0591717	-0.201004	0.0971805
		83	-0.03	0.08	0.15625	0.12
		84	-0.0971857	0.0709467	-0.137624	0.107273
		85	0.06	0.07	-0.03375	0.13
		86	-0.085703	0.0829571	-0.0490279	0.113461
		87	-0.05	0.09	-0.05375	0.14
		88	0.07	0.08	0.14625	0.14
		89	0.06	0.08	0.22625	0.16
		90	0.06	0.07	0.02625	0.15
		91	-0.01	0.08	-0.24375	0.12
		92	-0.09	0.07	-0.18375	0.13
		93	-0.05	0.08	-0.09375	0.12
		94	0.04	0.08	-0.18375	0.15
		Ave. Val.	-0.0595037	0.13 (2SD)	-0.134478	0.26 (2SD)
		Sol. Val.
		No.	δ56Fe (‰)	2SE	δ57Fe (‰)	2SE
		1	-0.0229442	0.0284767	-0.060757	0.0484828
		2	-0.0122185	0.0251702	-0.0135041	0.0438181
		3	-0.00655646	0.0274842	-0.00100042	0.0425083
		4	-0.0867262	0.0319087	-0.139815	0.0458133
		5	-0.0917948	0.0246732	-0.167326	0.0523723
		6	-0.0828556	0.0272351	-0.179087	0.047714
		Ave. Val.	-0.050516	0.07 (2SD)	-0.0935816	0.14 (2SD)

## Sheet: Table S7
Table S7. The S isotope composition in PAS-Py600, PAS-Cpy400 and PAS-Cpy600.
	Sample	LA Value
		No.	δ34S (‰)	2SE
	PAS-Py600	1	18.1315	0.0431209
		2	18.0799	0.0634612
		3	18.2555	0.0771277
		4	17.9979	0.0847452
		5	18.0474	0.0582879
		6	18.1285	0.0436695
		7	18.1859	0.0450997
		8	18.1887	0.0746991
		9	18.0151	0.0430691
		10	18.3472	0.0424198
		11	17.9365	0.0483597
		12	17.9405	0.0534671
		13	18.0943	0.0471966
		14	18.1112	0.061048
		15	17.9045	0.0525642
		16	18.1732	0.0598195
		17	17.899	0.0471135
		18	18.1191	0.0378873
		19	18.0747	0.0518806
		20	17.8913	0.0473079
		21	17.9539	0.0450658
		22	18.0369	0.0606251
		23	18.0999	0.0450304
		24	17.9792	0.0444589
		25	18.1482	0.0490406
		26	18.136	0.0309054
		27	18.2264	0.0480671
		28	18.2769	0.0364522
		29	18.1454	0.0455134
		30	18.2124	0.0448156
		31	18.0064	0.0594195
		32	18.0193	0.0404395
		33	17.986	0.0416418
		34	18.0198	0.0453813
		35	18.0223	0.0575172
		36	18.2172	0.0797687
		37	18.1394	0.069137
		38	17.8681	0.0601711
		39	17.9504	0.0597625
		40	17.7914	0.0490023
		41	17.8496	0.041185
		42	18.0976	0.0576021
		43	18.0307	0.0450619
		44	18.0209	0.0496845
		45	17.8947	0.0433928
		46	18.0238	0.0459914
		47	17.8243	0.041635
		48	18.0988	0.0449593
		49	18.1487	0.0405361
		50	17.8313	0.0452484
		51	17.9047	0.0420599
		52	18.0579	0.029145
		53	18.0962	0.0463094
		54	18.2709	0.0491156
		55	18.152	0.0383809
		56	18.2842	0.0428568
		57	18.1746	0.055945
		58	17.745	0.0444984
		59	18.0984	0.0301152
		60	18.1524	0.0384816
		61	17.9875	0.0535671
		62	18.0303	0.0443549
		63	18.1777	0.0432276
		64	17.832	0.0564651
		65	18.0404	0.0449002
		66	18.0045	0.0593864
		67	18.1169	0.041968
		68	17.9205	0.0538545
		69	18.1545	0.0365389
		70	18.1674	0.0408658
		71	18.0884	0.0661114
		72	17.9725	0.0476965
		73	17.9642	0.0477066
		74	18.1739	0.0973928
		75	18.0471	0.0372331
		Ave. Val.	18.0559	0.25 (2SD)
		EA-IR-MS
		No.	δ34S (‰)	2SD
		1	18.1847	\
		2	18.2563	\
		Ave. Val.	18.2205	0.0715673
	PAS-Cpy400	1	10.4218	0.0721503
		2	10.2717	0.0395244
		3	10.1786	0.0567442
		4	10.3817	0.0698556
		5	10.4199	0.0488149
		6	10.3825	0.0677412
		7	10.5089	0.0629371
		8	10.4021	0.0500215
		9	10.4518	0.0676035
		10	10.4475	0.0679735
		11	10.2701	0.0566991
		12	10.3112	0.0652262
		13	10.3939	0.0460172
		14	10.3178	0.0849604
		15	10.3651	0.0558639
		16	10.5138	0.0719005
		17	10.2346	0.0899556
		18	10.3466	0.0740256
		19	10.1325	0.0798669
		20	10.3202	0.0832611
		21	10.4884	0.0865383
		22	10.3688	0.102199
		23	10.3693	0.0592056
		24	10.221	0.0637151
		25	10.2076	0.0775556
		26	10.2823	0.0747409
		27	10.2501	0.0627368
		28	10.2962	0.0777187
		29	10.3725	0.0557777
		30	10.4035	0.061732
		31	10.4509	0.06557
		32	10.3807	0.0532145
		33	10.2395	0.0759067
		34	10.3256	0.0673763
		35	10.2854	0.0690329
		36	10.5292	0.0676489
		37	10.3736	0.067745
		38	10.4903	0.0669181
		39	10.3699	0.0835097
		40	10.3691	0.0788806
		41	10.3195	0.0916899
		42	10.4503	0.0871545
		43	10.3104	0.0926865
		44	10.268	0.0680224
		45	10.1722	0.0705843
		46	10.1487	0.0794604
		47	10.3569	0.101631
		48	10.2676	0.07353
		49	10.2704	0.0851025
		50	10.46	0.0860061
		51	10.277	0.0832063
		52	10.1213	0.0998113
		53	10.3227	0.0922274
		54	10.4158	0.0953485
		55	10.344	0.0790837
		56	10.5082	0.0844963
		57	10.3009	0.0737583
		58	10.3506	0.0907061
		59	10.5546	0.0678353
		60	10.3009	0.0578205
		61	10.3541	0.077843
		62	10.4536	0.0747294
		63	10.312	0.0488334
		Ave. Val.	10.3458	0.20 (2SD)
	PAS-Cpy600	1	10.4839	0.0727777
		2	10.3495	0.071628
		3	10.6117	0.086528
		4	10.6403	0.0596614
		5	10.251	0.0502894
		6	10.4018	0.0584559
		7	10.4216	0.0557827
		8	10.9359	0.061613
		9	10.4214	0.0782845
		10	10.3996	0.0641822
		11	10.3416	0.0816476
		12	10.2475	0.0672232
		13	10.3097	0.0806592
		14	10.3254	0.0752104
		15	10.4108	0.0799215
		16	10.0714	0.0803163
		17	10.426	0.0751027
		18	10.3559	0.0903764
		19	10.4216	0.106335
		20	10.2909	0.0498211
		21	10.5024	0.0889177
		22	10.4543	0.0778624
		23	10.4507	0.0734847
		24	10.4795	0.0818196
		25	10.4206	0.0756546
		26	10.512	0.0802378
		27	10.4703	0.0879025
		28	10.4212	0.0707071
		29	10.4081	0.0980857
		30	10.4922	0.0777091
		31	10.5174	0.0764183
		32	10.5158	0.0854965
		33	10.6686	0.0943229
		34	10.4934	0.0718792
		35	10.7902	0.0997748
		36	10.6573	0.0834311
		37	10.4336	0.0786832
		38	10.3885	0.0898312
		39	10.5612	0.0613724
		40	10.358	0.0744924
		41	10.4252	0.0795807
		42	10.3157	0.0777998
		43	10.391	0.0817792
		44	10.5688	0.097823
		45	10.4103	0.08518
		46	10.4108	0.0842852
		47	10.1166	0.0724647
		48	10.3031	0.0980599
		49	10.3132	0.0725764
		50	10.6295	0.0639656
		51	10.3866	0.0747777
		52	10.3103	0.0606984
		53	10.4291	0.0983977
		54	10.2623	0.0563505
		55	10.2732	0.0656981
		56	10.2574	0.071358
		57	10.3234	0.0809632
		58	10.2593	0.0974415
		59	10.7101	0.0745867
		60	10.5889	0.101599
		61	10.3283	0.0546624
		62	10.3691	0.0811837
		Ave. Val.	10.4273	0.29 (2SD)
		EA-IR-MS
		No.	δ34S (‰)	2SD
		1	10.7489	\
		2	10.4195	\
		Ave. Val.	10.5842	0.329405

## Sheet: Table S8
	Table S8. The Fe isotope results of natural reference materials Aa018 and Ly obtained from fs-LA-MC-ICP-MS. The synthesis standards PAS-Py600 was used as external standard.
		LA Value
		No.	δ56FeIRMM-014 (‰)	2SE	δ57FeIRMM-014 (‰)	2SE
	Aa018	1	0.65	0.11	0.98	0.17
		2	0.55	0.1	0.82	0.19
		3	0.49	0.09	0.62	0.13
		4	0.49	0.08	0.73	0.12
		5	0.56	0.07	0.74	0.13
		6	0.65	0.05	0.95	0.08
		7	0.53	0.04	0.93	0.09
		8	0.56	0.09	0.87	0.13
		9	0.58	0.08	0.92	0.15
		10	0.54	0.08	0.78	0.1
		Ave. Val.	0.56	0.11 (2SD)	0.83	0.22 (2SD)
		Ref. Val. (Chen et al. 2021)
			δ56FeIRMM-014 (‰)	2SD	δ57FeIRMM-014 (‰)	2SD
			0.52	0.04	0.73	0.05
	Ly	1	0.68	0.05	0.98	0.11
		2	0.61	0.05	0.98	0.11
		3	0.63	0.04	0.91	0.1
		4	0.73	0.04	1.02	0.07
		5	0.62	0.06	1.02	0.1
		6	0.65	0.06	1.06	0.1
		7	0.72	0.05	1.03	0.11
		8	0.64	0.04	0.93	0.1
		9	0.59	0.05	0.87	0.08
		10	0.65	0.04	1.01	0.07
		Ave. Val.	0.65	0.09 (2SD)	0.98	0.11 (2SD)
		Ref. Val. (Chen et al. 2021)
			δ56FeIRMM-014 (‰)	2SD	δ57FeIRMM-014 (‰)	2SD
			0.6	0.05	0.85	0.06
	References: K. Y. Chen, H. L. Yuan, Z. A. Bao and N. Lv, Atom. Spectrosc., 2021, 42, 282–293.

## Sheet: Table S9
	Table S9. The S isotope results of natural reference materials PPP-1 and YP136 obtained from fs-LA-MC-ICP-MS. The synthesis standards PAS-Cpy was used as external standard.
	Sample	LA Value
		No.	δ34SV-CDT (‰)	2SE
	PPP-1	1	5.56	0. 05
		2	5.17	0.05
		3	5.57	0.07
		4	5.27	0.07
		5	5.22	0.06
		6	5.51	0.06
		7	5.53	0.08
		8	5.66	0.06
		9	5.64	0.05
		10	5.48	0.05
		Ave. Val.	5.46	0.33
		Ref. Val. (Gilbert et al. 2014)
			δ34SV-CDT (‰)	2SD
			5.3	0.2
	PY136	1	1.44	0.1
		2	1.41	0.09
		3	1.55	0.1
		4	1.47	0.09
		5	1.53	0.13
		6	1.48	0.11
		7	1.2	0.11
		8	1.39	0.13
		9	1.76	0.14
		10	1.3	0.13
		Ave. Val.	1.45	0.29
		Ref. Val. (Li et al. 2018)
			δ34SV-CDT (‰)	2SD
			1.5	0.06
	References: 1. S. E. Gilbert, L. V. Danyushevsky, T. Rodemann, N. Shimizu, A. Gurenko, S. Meffre, H. Thomas, R. R. Large and D. Death, J. Anal. At. Spectrom., 2014, 29, 1042–1051. 2. R. C. Li, X. P. Xia, S. H. Yang, H. Y. Chen and Q. Yang, Geostand. Geoanal. Res., 2018, 43, 177–187.
